# Supplementary material for: In vivo metabolic imaging identifies lipid vulnerability in a preclinical model of Her2+/Neu breast cancer residual disease and recurrence
Source: PubMed Central journal article supplement (PMC9512922; doi:10.1038/s41523-022-00481-3), 2022-09-26
Supplement: 41523_2022_481_MOESM1_ESM.pdf [file 41523_2022_481_MOESM1_ESM.pdf]

1 **In vivo metabolic imaging identifies lipid vulnerability in a preclinical model of**  
2 **Her2+/Neu breast cancer residual disease and recurrence**

3 **Authors**

4 Megan C. Madonna<sup>1,\*</sup>, Joy E. Duer<sup>2</sup>, Brock J. McKinney<sup>3</sup>, Enakshi D. Sunassee<sup>1</sup>, Brian  
5 T. Crouch<sup>1</sup>, Olga Ilkayeva<sup>4</sup>, Matthew D. Hirschey<sup>3,4,5</sup>, James V. Alvarez<sup>3</sup>, Nirmala  
6 Ramanujam<sup>1,3</sup>

7  
8 **Affiliations**

9 <sup>1</sup> Department of Biomedical Engineering, Duke University, Durham, NC, USA

10 <sup>2</sup> Duke University Trinity College of Arts and Sciences, Durham, NC, USA

11 <sup>3</sup>Department of Pharmacology & Cancer Biology, School of Medicine, Duke University,  
12 Durham, NC USA

13 <sup>4</sup>Duke Molecular Physiology Institute and Sarah W. Stedman Nutrition and Metabolism  
14 Center, Durham, NC, USA

15 <sup>5</sup>Department of Medicine, Division of Endocrinology, Metabolism, and Nutrition, Duke  
16 University Medical Center, Durham, NC, USA

17

18 **Corresponding Author**

19 \*Department of Biomedical Engineering

20 1427 FCIEMAS, 101 Science Dr.

21 Campus Box 90281

22 Durham, NC 27708-0281

23 Phone: 919-660-8473

24 Fax: 919-684-4488

25 Email: [megan.madonna@duke.edu](mailto:megan.madonna@duke.edu)

26

27 **Supplementary Figure 1**

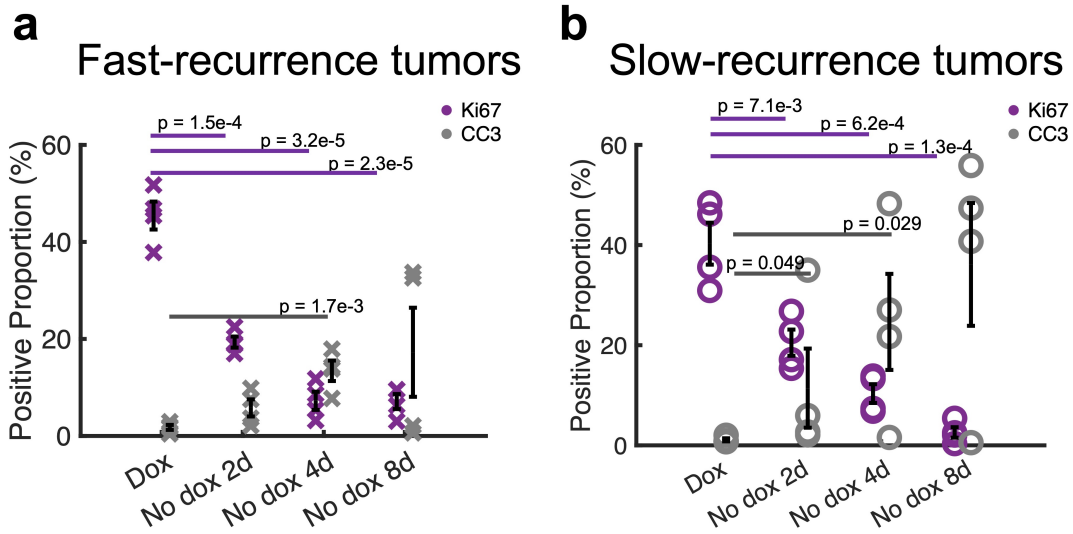

28

29 **Supplementary Figure 1: Quantification of immunohistochemistry results confirm**

30 **changes in proliferation and apoptosis. Ki67 and cleaved caspase 3 (CC3) were**

31 imaged from sectioned primary (+dox) and regression (No dox 2, 4, 8 days) for (a) fast-

32 recurrence tumors and (b) slow-recurrence tumors. Ki67 and CC3 proportions were

33 quantified by binary thresholding each cell as either positive or negative for staining.

34 Additionally, statistical analysis using a one-way ANOVA followed by a Tukey test for

35 multiple comparisons shows the highest proportion of Ki67 positive cells in primary tumors

36 (Dox) and an increase in CC3 positive cells in regressing cells (No dox). n = 4 tumors.

37 Error bar = standard error of the mean.

38 **Supplementary Figure 2**

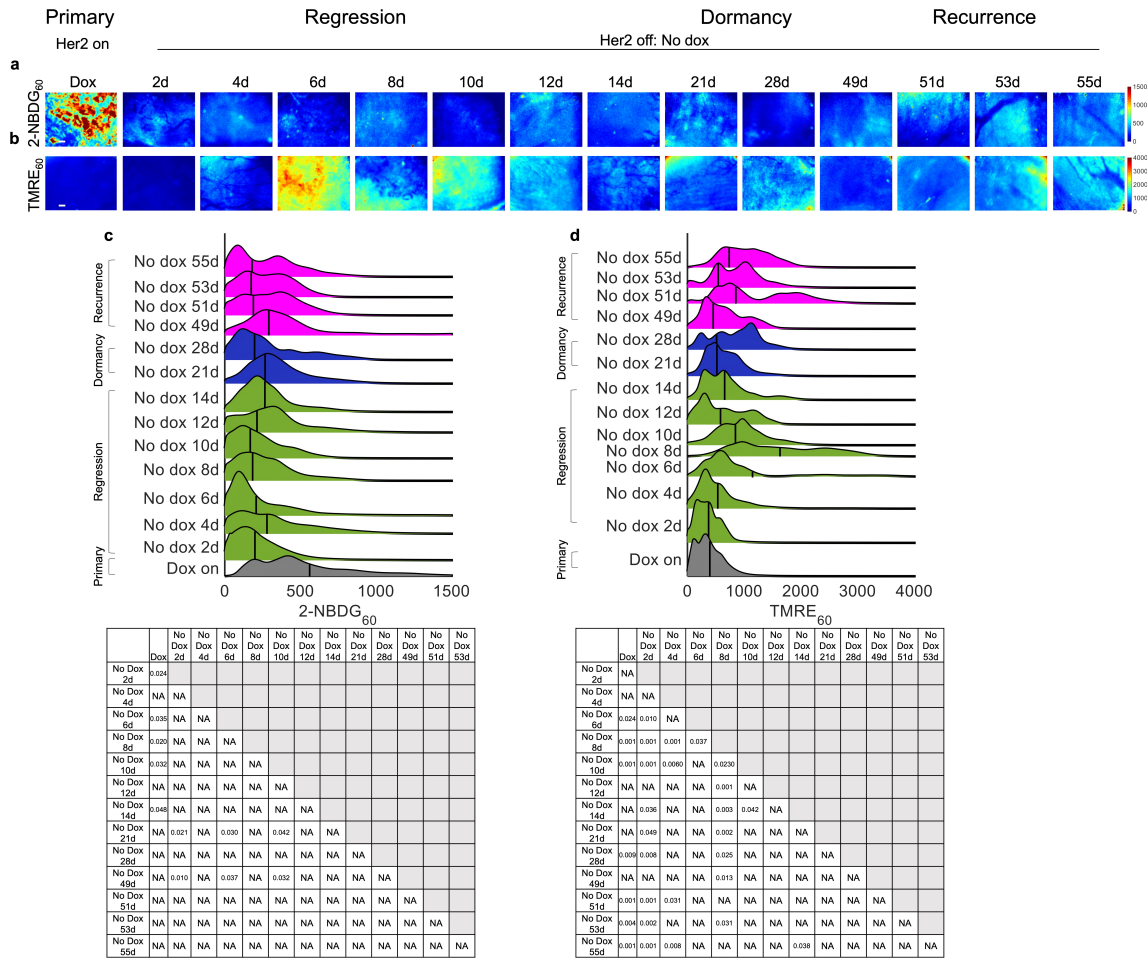

39

40 **Supplementary Figure 2: Metabolic imaging following Her2 downregulation in**  
 41 **tumors with a short period of dormancy.** Representative images of (a) 2-NBDG<sub>60</sub> and  
 42 (b) TMRE<sub>60</sub> in a mammary tumor for Her2 on (+ dox) (n = 10) and Her2-off imaged every  
 43 other day for 14 days (n = 10), during sustained growth arrest (No dox 21 and 28 days  
 44 dox) (n = 8), and during regrowth (No dox 49-55 days) (n = 7). Scale bar = 200 μm. (c) 2-  
 45 NBDG<sub>60</sub> and (d) TMRE<sub>60</sub> PDF ridgeline plots for Her2 on (+ dox) or Her2 off (- dox) across  
 46 all pixels and all mice at each time point. Vertical lines superimposed on PDF curves  
 47 report the average fluorescence. Statistical comparisons were performed using a  
 48 Kolmogorov-Smirnov test; NS = not significant.

49 **Supplementary Figure 3**

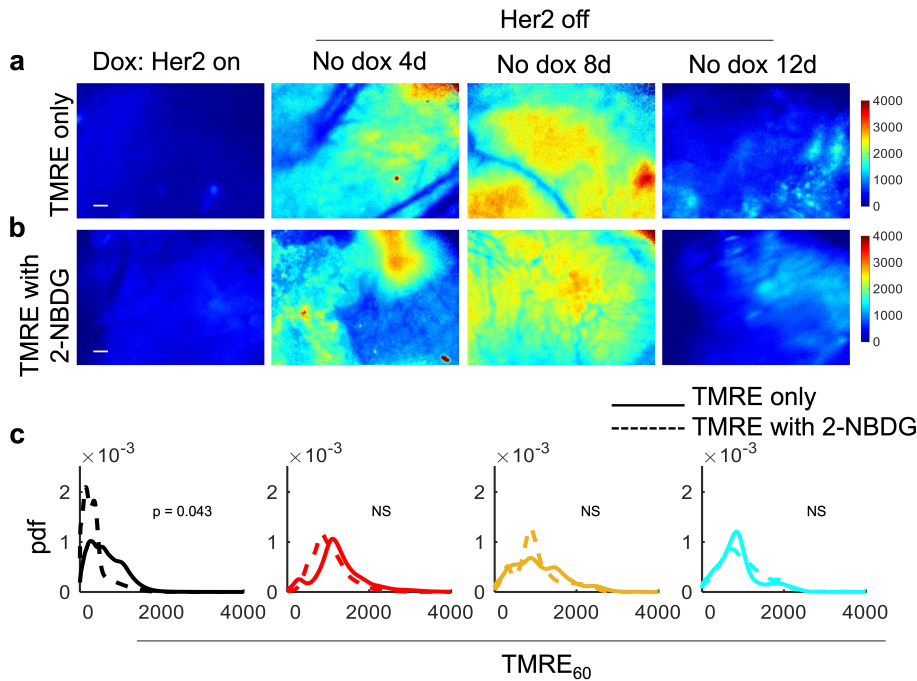

50

51 **Supplementary Figure 3: Simultaneous imaging does not mask metabolic changes**

52 **following Her2 downregulation.** Primary (Her2 on) and Her2 downregulated tumors in

53 mammary window chambers were imaged following TMRE only or TMRE and 2-NBDG

54 injections. (a) Representative TMRE<sub>60</sub> images following TMRE only injection from

55 mammary tumors for Her2 on (+ dox) (n = 10 mice) or Her2-off (4, 8, and 12 days after

56 dox was removed, n = 12, 10, 7, respectively). (b) Representative TMRE<sub>60</sub> images

57 following TMRE + 2-NBDG injection from mammary tumors for Her2 on (+ dox) or Her2-

58 off (4, 8, and 12 days after dox was removed) (all groups; n = 10 mice). Scale bar = 200

59  $\mu$ m. (c) TMRE<sub>60</sub> PDFs for Her2 on (+ dox) or Her2 off (- dox) across all pixels and all mice

60 in each group. Statistical comparisons were performed using a Kolmogorov-Smirnov test;

61 NS = not significant.

62 **Supplementary Figure 4**

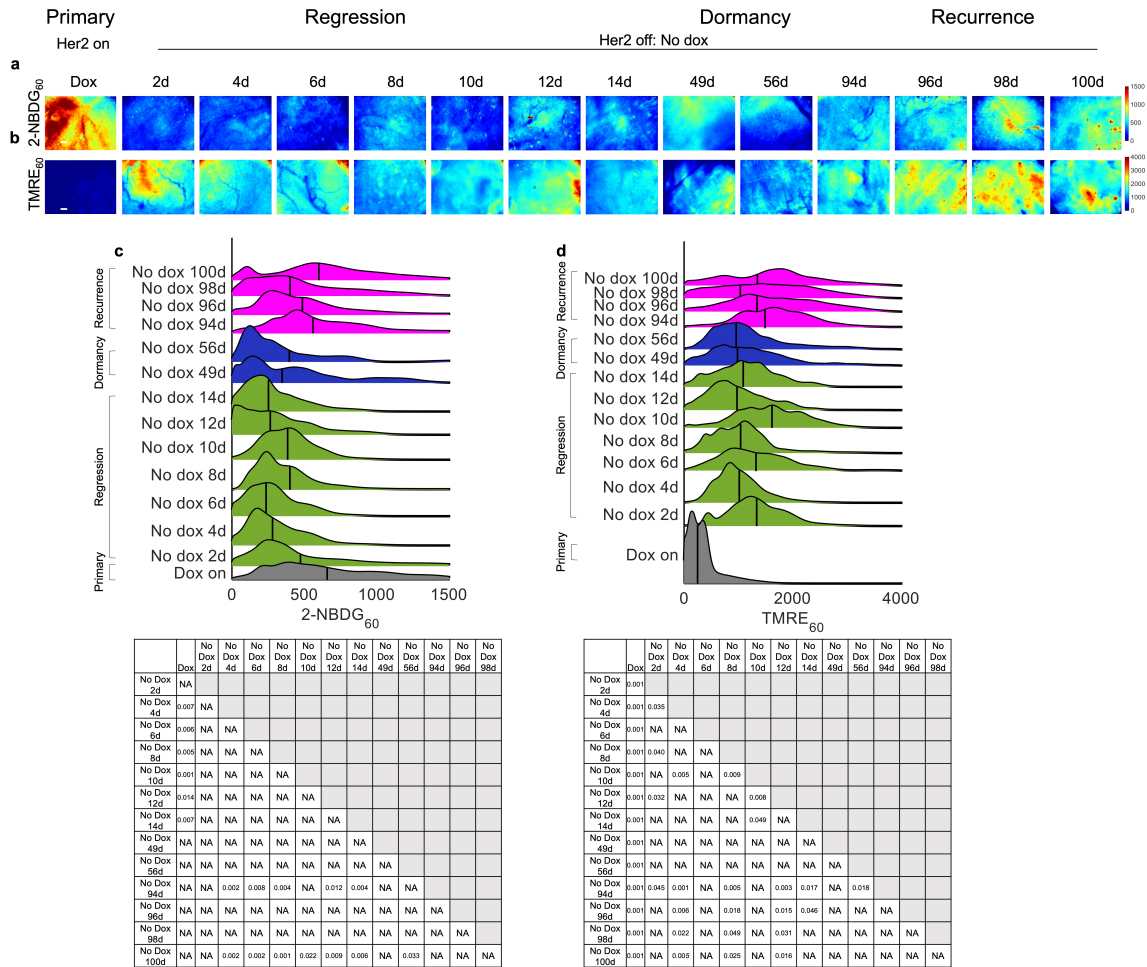

63

64 **Supplementary Figure 4: Metabolic imaging following Her2 downregulation in**

65 **tumors with a long period of dormancy.** Representative images of (a) 2-NBDG<sub>60</sub> and

66 (b) TMRE<sub>60</sub> in a mammary tumor for Her2 on (+ dox) (n = 10) and Her2-off imaged every

67 other day for 14 days (n = 10), during sustained growth arrest (No dox 49 and 56 days –

68 dox) (n = 8), and during regrowth (No dox 94-100 days – dox) (n = 9). Scale bar = 200

69 μm. (c) 2-NBDG<sub>60</sub> and (d) TMRE<sub>60</sub> PDF ridgeline plots for Her2 on (+ dox) or Her2 off (-

70 dox) across all pixels and all mice at each time point. Vertical lines superimposed on PDF

71 curves report the average fluorescence. Statistical comparisons were performed using a

72 Kolmogorov-Smirnov test; NS = not significant.

73 **Supplementary Figure 5**

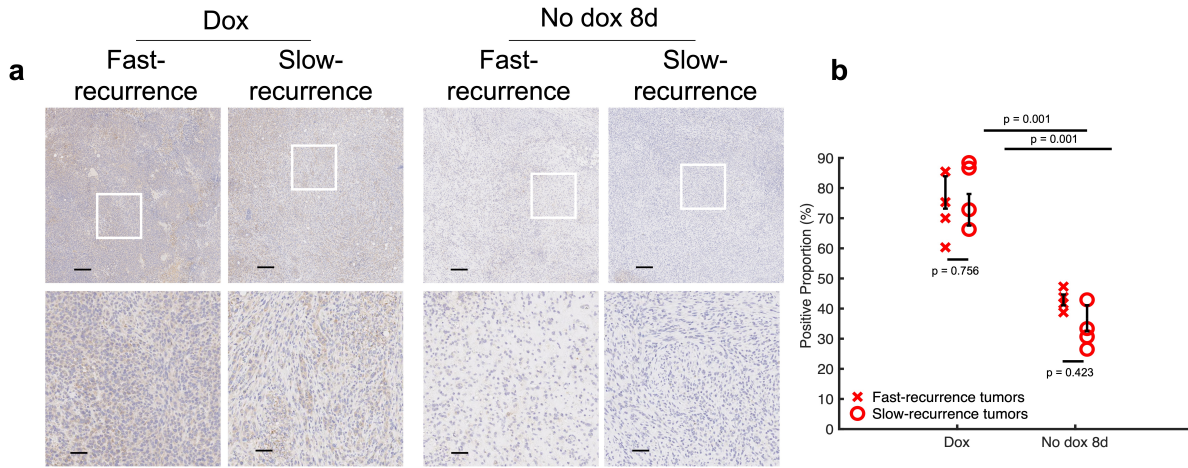

74

75 **Supplementary Figure 5: Immunohistochemistry and quantification of ATP5A1 as**  
 76 **a surrogate for mitochondrial content comparison between fast and slow recurring**  
 77 **tumors.** ATP5A1 (brown), a key subunit of the ATP synthase complex localized within  
 78 the mitochondria, was (a) imaged and (b) quantified from sectioned primary (Dox) and  
 79 regressing tumors. White boxes indicate magnified section shown in bottom panels. Scale  
 80 bars represent 200 $\mu$ m (top panels) and 50 $\mu$ m (bottom panels). ATP5A1 proportions were  
 81 quantified by binary thresholding each cell as either positive or negative for staining.  
 82 Additionally, statistical analysis using a one-way ANOVA followed by a Tukey test for  
 83 multiple comparisons shows no significant difference in ATP5A1 positive cells in slow-  
 84 compared to fast-recurrence primary (Dox) tumors and slow- compared to fast-recurrence  
 85 regression. n = 4 tumors. Error bar = standard error of the mean.

86 **Supplementary Figure 6**

**a** Primary vs. Dormancy

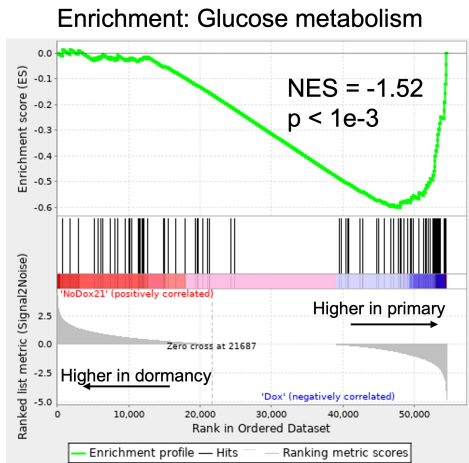

**b**

Primary vs. Dormancy

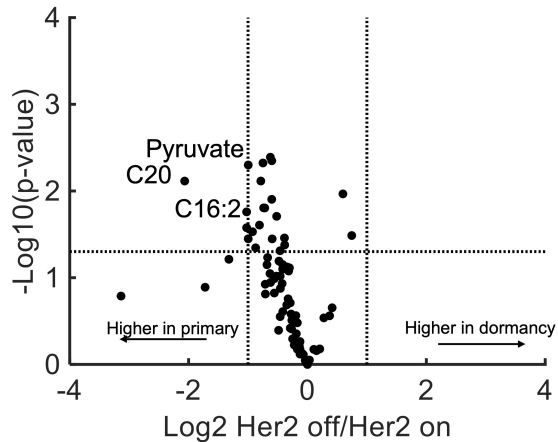

87

88 **Supplementary Figure 6: Changes in transcription and metabolite levels in**

89 **dormant tumors compared to primary tumors. (a)** Gene set enrichment analysis

90 (GSEA) of primary (dox) and dormant (no dox 21 days) tumors showing enrichment of

91 the glucose metabolism gene set in primary tumors compared to dormant tumors, similar

92 to results seen in primary tumors compared to regressing tumors. Enrichment scores

93 were calculated using the KS statistic and p-values were calculated using permutation

94 testing with 1000 permutations. **(b)** Volcano plot of fold-change in metabolite levels

95 between dormant and primary tumors. Dashed lines represent p < 0.05 via two-sided t-test

96 and |Log<sub>2</sub>FoldChange| > 1. Significantly different metabolites are labeled within graph. n

97 = 5 per group.
